# Supplementary material for: Experimental and theoretical determination of adsorption heats of CO2 over alkali metal exchanged ferrierites with different Si/Al ratio
Source: Royal Society of Chemistry journal article supplement (doi:10.1039/c001950j), 2010-01-01
Supplement: c001950j.pdf [file c001950j.pdf]

## Supplementary Information

### Experimental and theoretical determination of adsorption heats of CO<sub>2</sub> over alkali metal exchanged ferrierites with different Si/Al ratio

Arnošt Zukal, Angeles Pulido, Barbara Gil, Petr Nachtigall, Ota Bludský, Miroslav Rubeš,  
and Jiří Čejka

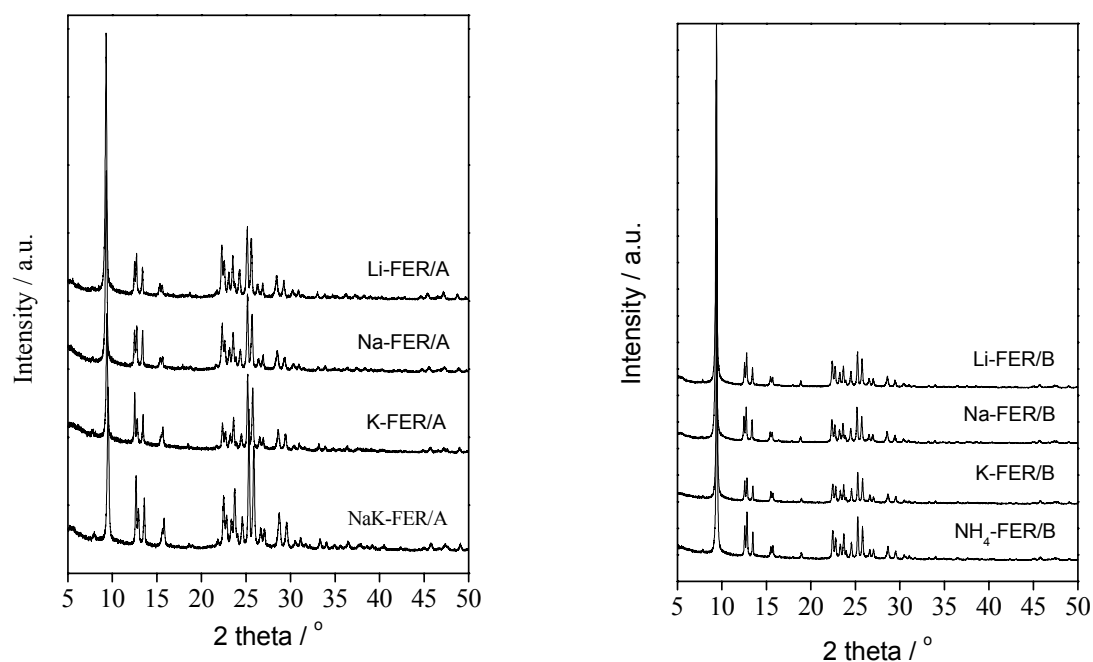

**Fig. S1.** X-ray diffraction patterns of parent ferrierites and their alkali forms obtained after the complete ion exchange.

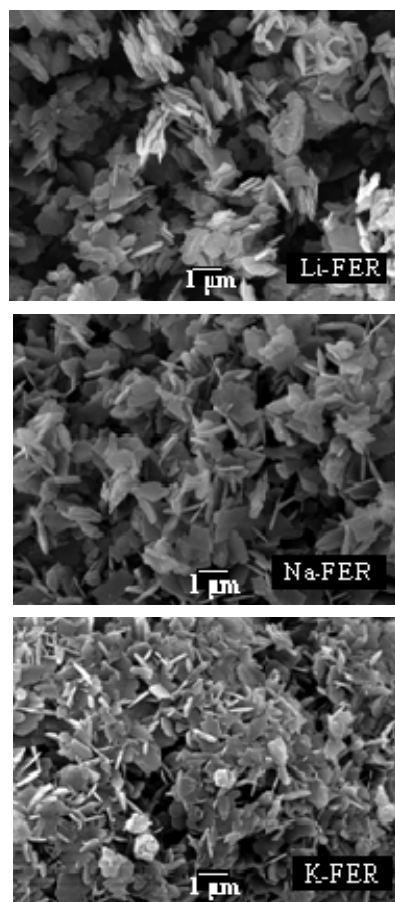

**Fig. S2.** Scanning electron micrographs of Li-, Na- and K-FER/A.

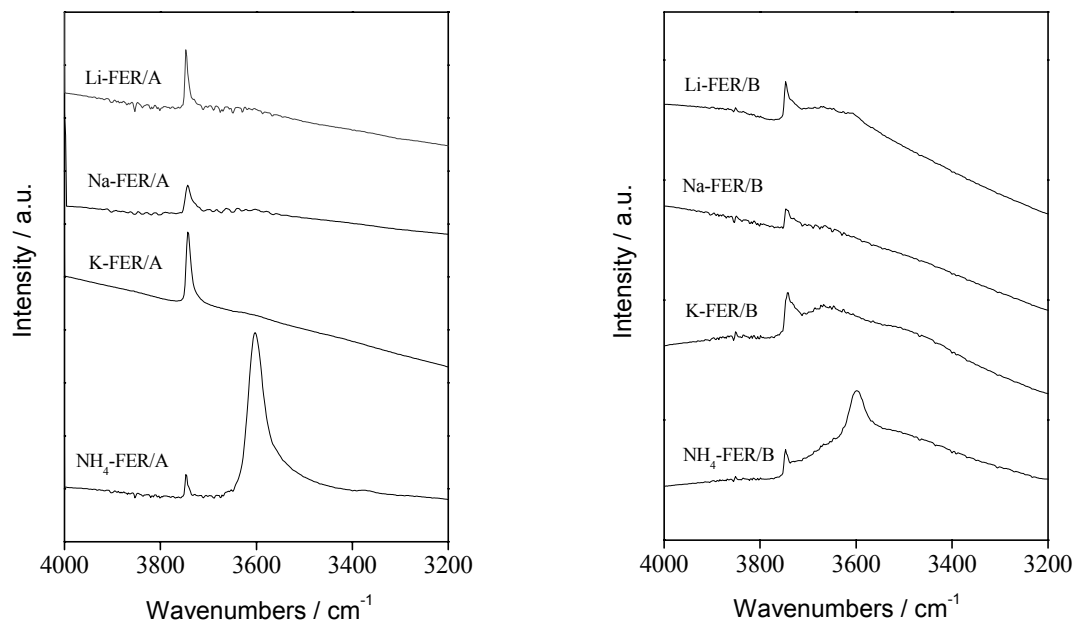

**Fig. S3.** FTIR spectra of the protonic forms of FER/A and FER/B and their respective alkali metal exchanged forms.

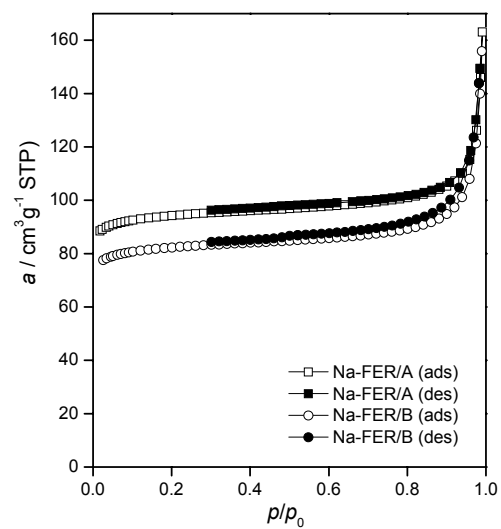

**Fig. S4.** Adsorption isotherms of nitrogen on Na-FER/A and Na-FER/B at 77 K. (Adsorption isotherm for the sample Na-FER/A is offset vertically by  $10 \text{ cm}^3 \text{g}^{-1}$  STP.)

Supplementary Material for PCCP

This journal is © The Owner Societies 2010

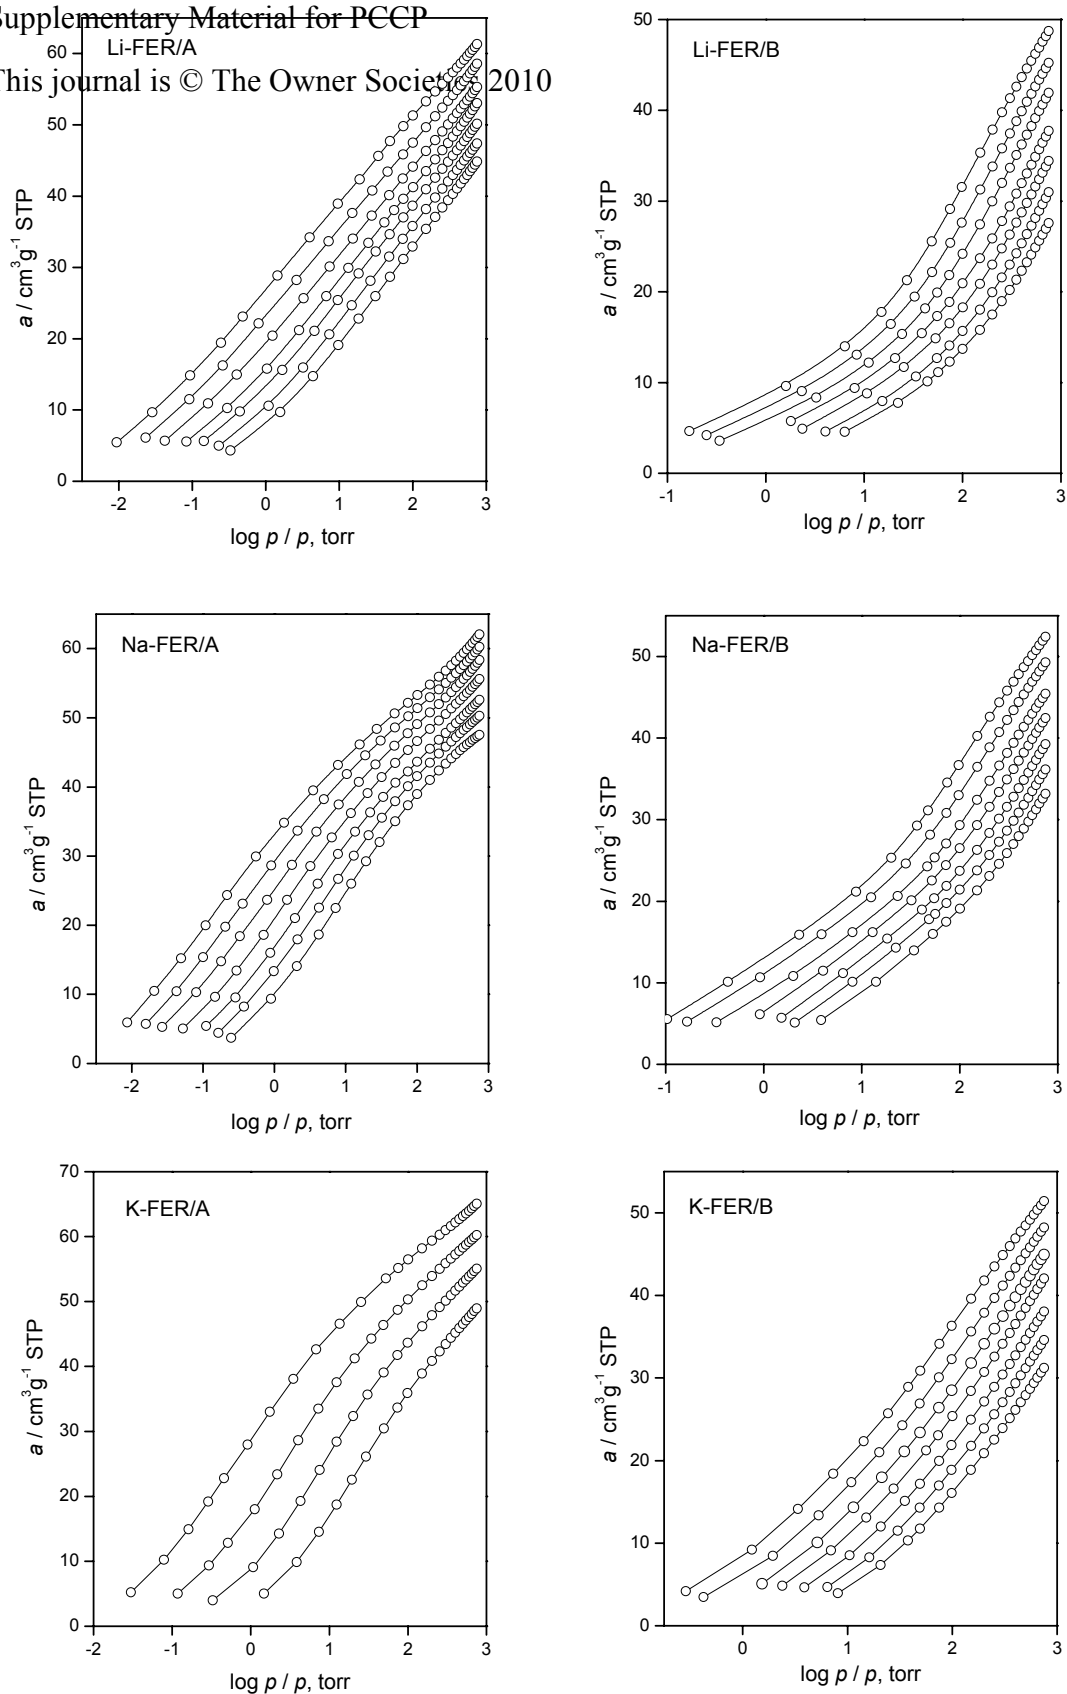

**Fig. S5.** Adsorption isotherms of carbon dioxide for Li-, Na- and K-FER at 273, 283, 293, 303, 313, 323 and 333 K (in the direction from left to right) in semilogarithmic coordinates. ( $\text{CO}_2$  isotherms on the sample K-FER/A were measured at four temperatures only.)

Table S1. Calculated characteristics of CO<sub>2</sub> adsorption complexes on Na-FER.

| Na <sup>+</sup> siting <sup>a</sup>     | D(Na <sup>+</sup> —O) <sup>b</sup> | CO <sub>2</sub> /uc | $\Delta\omega_3^c$ | $\Delta E_{\text{int}}^{\text{DFT}}$ <sup>d</sup> | $\Delta Z\text{PVE}^d$ | $\Delta E^{\text{DFT}/\text{CC}}$ <sup>d</sup> | $-\Delta H_{\text{ads}}^0$ <sup>d</sup> |
|-----------------------------------------|------------------------------------|---------------------|--------------------|---------------------------------------------------|------------------------|------------------------------------------------|-----------------------------------------|
| <i>Single cation sites</i>              |                                    |                     |                    |                                                   |                        |                                                |                                         |
| P6/T1                                   | 2.33                               | 1                   | 19                 | -23                                               | 1                      | -20                                            | 42                                      |
| I2/T2                                   | 2.34                               | 1                   | 16                 | -29                                               | 2                      | -18                                            | 45                                      |
| M7/T3                                   | 2.36                               | 1                   | 12                 | -29                                               | 2                      | -20                                            | 47                                      |
| I2/T4                                   | 2.34                               | 1                   | 19                 | -28                                               | 2                      | -18                                            | 44                                      |
| P8/T4                                   | 2.31                               | 1                   |                    | -26                                               | 1                      | -19                                            | 44                                      |
| M5/T4                                   | 2.37                               | 1                   | 17                 | -28                                               | 2                      | -20                                            | 46                                      |
| <i>Dual cation sites</i>                |                                    |                     |                    |                                                   |                        |                                                |                                         |
| P6/T1..P6T1 (7.6)                       | 2.33 / 3.06                        | 1                   |                    | -25                                               | 1                      | -22                                            | 46                                      |
| I2/T2..I2/T2 (7.3)                      | 2.47 / 2.50                        | 1                   | 30                 | -40                                               | 2                      | -17                                            | 55                                      |
| M7/T3..P8/T2 (7.4)                      | 2.58 / 3.01                        | 1                   | 10                 | -32                                               | 2                      | -28                                            | 58                                      |
| I2/T4..M5/T4 (6.2)                      | 2.34 / 2.48                        | 1                   |                    | -35                                               | 2                      | -23                                            | 56                                      |
| M5/T4..I2/T2 (6.8)                      | 2.37 / 2.50                        | 1                   | 26                 | -37                                               | 2                      | -22                                            | 57                                      |
| <i>Geminal CO<sub>2</sub> complexes</i> |                                    |                     |                    |                                                   |                        |                                                |                                         |
| P6/T1                                   | 2.44, 2.51                         | 2                   |                    | -16                                               | 3                      | -20                                            | 33                                      |
| I2/T2                                   | 2.37, 2.38                         | 2                   | 17, 12             | -24                                               | 3                      | -18                                            | 39                                      |
| M7/T3                                   | 2.40, 2.42                         | 2                   | 15, 5              | -21                                               | 1                      | -20                                            | 40                                      |
| I2/T4                                   | 2.37, 2.37                         | 2                   |                    | -25                                               | 2                      | -18                                            | 41                                      |
| M5/T4                                   | 2.33, 3.95                         | 2                   |                    | -11                                               | 3                      | -29                                            | 37                                      |

<sup>a</sup> Distance between two M<sup>+</sup> cations forming a dual cation site are given in parentheses (in Å).<sup>b</sup> Distance between M<sup>+</sup> and oxygen atoms of CO<sub>2</sub>; distances for both CO<sub>2</sub> oxygen atoms to the closest M<sup>+</sup> are given in the case of dual cation sites.<sup>c</sup> CO<sub>2</sub> asymmetric frequency shift with respect to gas phase CO<sub>2</sub> (2365 cm<sup>-1</sup> at periodic PBE level), in cm<sup>-1</sup>.<sup>d</sup> In kJ/mol.
